# Supplementary material for: Development of a new approach for targeted gene editing in primordial germ cells using TALENs in Xenopus
Source: PubMed Central journal article supplement (PMC4359732; doi:10.1242/bio.201410926), 2015-02-06
Supplement: supp_bio.201410926_bio.201410926-s1.pdf [file supp_bio.201410926_bio.201410926-s1.pdf]

**Supplementary Material****Keisuke Nakajima and Yoshio Yaoita doi: 10.1242/bio.201410926**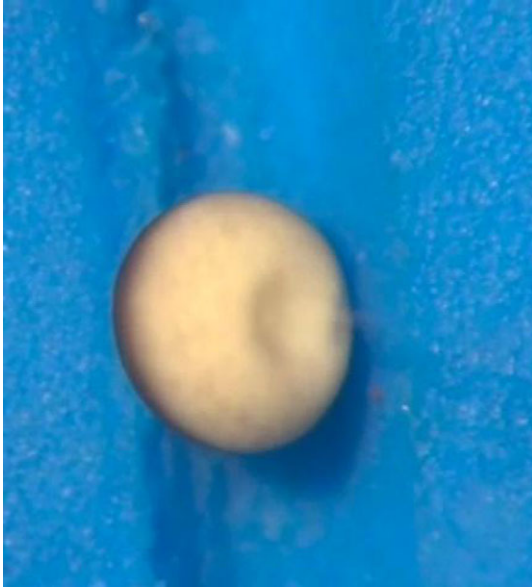

Movie 1. The injection of TALEN-DS mRNAs into the cortical region of the vegetal pole of fertilized *X. tropicalis* eggs.
